# Supplementary material for: Association between Microsatellite Instability Status and Peri-Operative Release of Circulating Tumour Cells in Colorectal Cancer
Source: MDPI journal article supplement (doi:10.3390/cells9020425), 2020-02-12
Supplement: s1 [file s1]

## Supplementary Material

Table S1. Patient, MSI status, stage and CTC number at different time points.

| Patient* | MSI Status | Stage | CTC Number |     |    |    |
|----------|------------|-------|------------|-----|----|----|
|          |            |       | t1         | t2  | t3 | t4 |
| S1       | MSS        | I     | 8          | 5   | 2  | 1  |
| S2       | MSI-H      | II    | 11         | 55  | 1  | 6  |
| S3       | MSS        | II    | 11         | 12  | 7  | 11 |
| S4       | MSS        | II    | 0          | 1   | 0  | 0  |
| S5       | MSS        | I     | 5          | 4   | 2  | 12 |
| S6       | MSS        | III   | 1          | 0   | 0  | 0  |
| S8       | MSS        | III   | 0          | 1   | 0  | 6  |
| S9       | MSS        | III   | 2          | 0   | 0  | 0  |
| S10      | MSI-H      | III   | 29         | 44  | 38 | 57 |
| S11      | MSS        | III   | 2          | 1   | 1  | 0  |
| S12      | MSI-H      | II    | 10         | 49  | 8  | 11 |
| S13      | MSS        | II    | 0          | 0   | 1  | 0  |
| S14      | MSS        | I     | 0          | 0   | 0  | 0  |
| S15      | MSS        | II    | 0          | 1   | 0  | 2  |
| S16      | MSS        | IV    | 13         | 189 | 83 | 65 |
| S18      | MSI-H      | III   | 0          | 3   | 2  | 1  |
| S19      | MSS        | III   | 61         | 74  | 17 | 12 |

\*Non- cancer patients were excluded from the Table
